# Supplementary material for: Mechanochemical Synthesis of Li2MnO3 Shell/LiMO2 (M = Ni, Co, Mn) Core-Structured Nanocomposites for Lithium-Ion Batteries
Source: PubMed Central journal article supplement — Sci Rep. 2014 May 2;4:4847. doi: 10.1038/srep04847 (PMC4007074; doi:10.1038/srep04847), 2014-05-02
Supplement: srep04847-s1.pdf [file srep04847-s1.pdf]

## SUPPLEMENTARY INFORMATION

### **Mechanochemical Synthesis of $\text{Li}_2\text{MnO}_3$ Shell/ $\text{LiMO}_2$ (M = Ni, Co, Mn)**

#### **Core-Structured Nanocomposites for Lithium-Ion Batteries**

Jae-Kyo Noh<sup>#1,2</sup>, Soo Kim<sup>#1,3</sup>, Haesik Kim<sup>1</sup>, Wonchang Choi<sup>1</sup>, Wonyoung Chang<sup>1</sup>,  
Dongjin Byun<sup>2</sup>, Byung-Won Cho<sup>\*1</sup>, and Kyung Yoon Chung<sup>\*1</sup>

<sup>1</sup>*Center for Energy Convergence, Korea Institute of Science and Technology,  
Hwarangno 14-gil-5, Seongbuk-gu, Seoul 136-791, Republic of Korea*

<sup>2</sup>*Department of Material Science and Engineering, Korea University, Anan-dong 5-1,  
Seongbuk-gu, Seoul 136-701, Republic of Korea*

<sup>3</sup>*Current address: Department of Materials Science and Engineering, Northwestern  
University, 2220 Campus Drive, Evanston, IL 60208, USA*

<sup>#</sup>These authors contributed equally to this work.

<sup>\*</sup>Corresponding authors:

E-mail: bwcho@kist.re.kr (B. W. Cho); Tel: +82-2-958-5222; Fax: +82-2-958-5229

kychung@kist.re.kr (K. Y. Chung); Tel: +82-2-958-5225; Fax: +82-2-958-5229

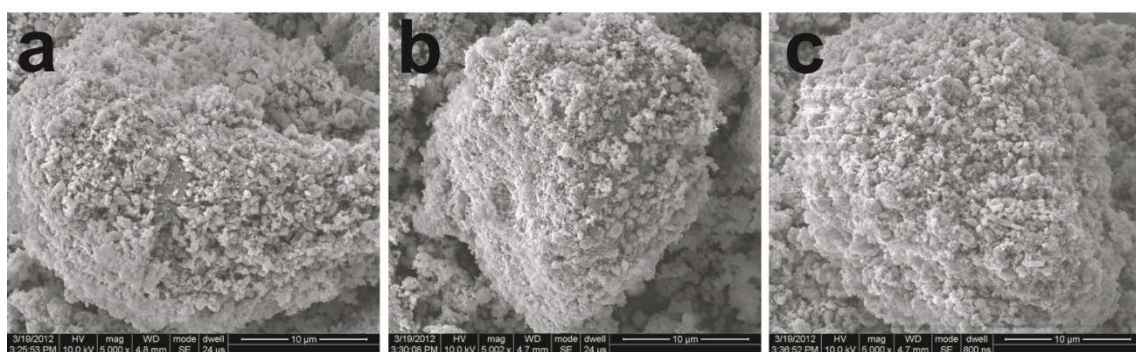

**Figure S1.** SEM images of  $x\text{Li}_2\text{MnO}_3 \cdot (1-x)\text{LiNi}_{0.5}\text{Co}_{0.2}\text{Mn}_{0.3}\text{O}_2$  (a)  $x = 0.3$ , (b)  $x = 0.5$ , (c)  $x = 0.7$  heat-treated at  $700\text{ }^\circ\text{C}$ .

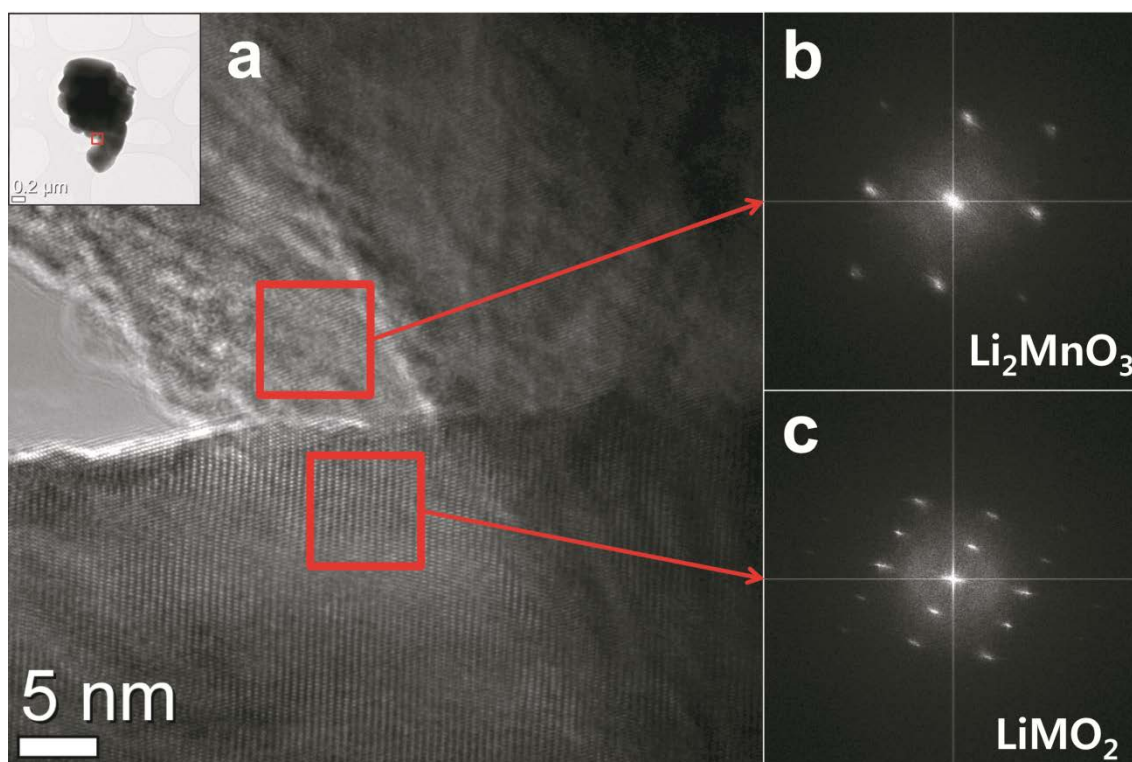

**Figure S2.** (a) HR-TEM image of  $0.5\text{Li}_2\text{MnO}_3 \cdot 0.5\text{LiNi}_{0.5}\text{Co}_{0.2}\text{Mn}_{0.3}\text{O}_2$  heat treated at  $1000\text{ }^\circ\text{C}$ , (b) and (c) FFTs of the regions indicated in (a).

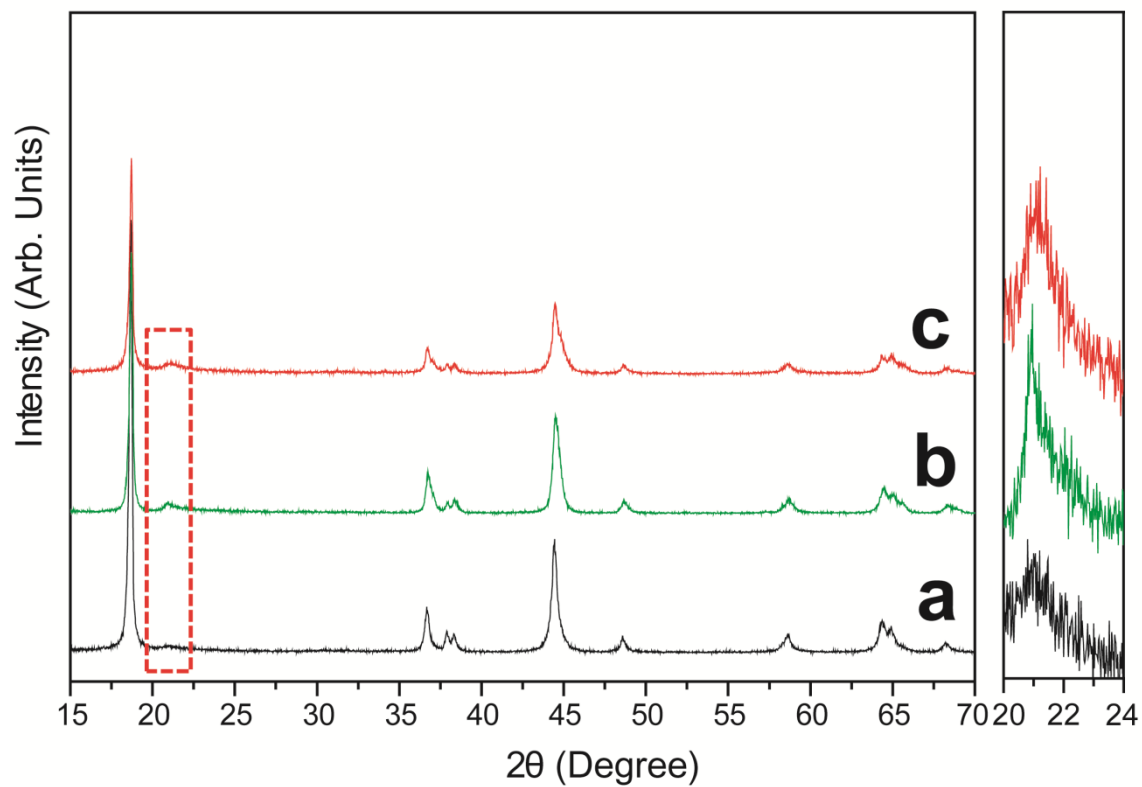

**Figure S3.** XRD patterns of  $x\text{Li}_2\text{MnO}_3 \cdot (1-x)\text{LiNi}_{0.5}\text{Co}_{0.2}\text{Mn}_{0.3}\text{O}_2$  for (a)  $x = 0.3$ , (b)  $x = 0.5$ , (c)  $x = 0.7$  heat-treated at 400 °C.

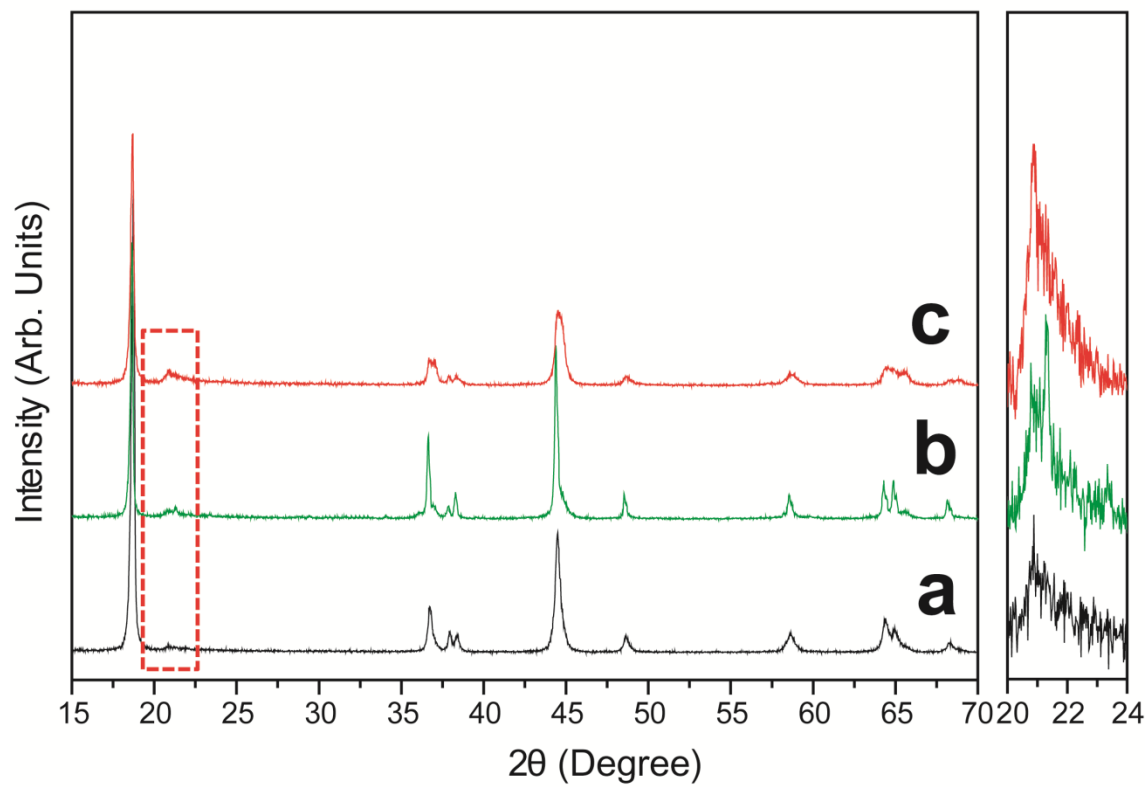

**Figure S4.** XRD patterns of  $x\text{Li}_2\text{MnO}_3 \cdot (1-x)\text{LiNi}_{0.5}\text{Co}_{0.2}\text{Mn}_{0.3}\text{O}_2$  for (a)  $x = 0.3$ , (b)  $x = 0.5$ , (c)  $x = 0.7$  heat-treated at 700 °C.

**Table S1.** Lattice parameters,  $c/a$  ratio and crystallite size of the  $x\text{Li}_2\text{MnO}_3 \cdot (1-x)\text{LiNi}_{0.5}\text{Co}_{0.2}\text{Mn}_{0.3}\text{O}_2$ . (A :  $\text{Li}_2\text{MnO}_3$ , B :  $\text{LiNi}_{0.5}\text{Co}_{0.2}\text{Mn}_{0.3}\text{O}_2$ )

| T (°C) | Sample      | $a$ (Å) | $c$ (Å) | $c/a$  | Crystallite size (Å) |
|--------|-------------|---------|---------|--------|----------------------|
| 400    | 0.3A · 0.7B | 2.8689  | 14.2213 | 4.9570 | 138.0                |
|        | 0.5A · 0.5B | 2.8706  | 14.2228 | 4.9546 | 78.3                 |
|        | 0.7A · 0.3B | 2.8720  | 14.2238 | 4.9526 | 41.6                 |
| 700    | 0.3A · 0.7B | 2.8679  | 14.2289 | 4.9614 | 314.6                |
|        | 0.5A · 0.5B | 2.8695  | 14.2349 | 4.9607 | 276.0                |
|        | 0.7A · 0.3B | 2.8710  | 14.2403 | 4.9601 | 249.8                |
| 1000   | 0.3A · 0.7B | 2.8632  | 14.2358 | 4.9719 | 491.0                |
|        | 0.5A · 0.5B | 2.8577  | 14.2351 | 4.9813 | 480.0                |
|        | 0.7A · 0.3B | 2.8620  | 14.2585 | 4.9821 | 452.0                |

**Table S2.** Capacities of the  $x\text{Li}_2\text{MnO}_3 \cdot (1-x)\text{LiNi}_{0.5}\text{Co}_{0.2}\text{Mn}_{0.3}\text{O}_2$  ( $x = 0.3, 0.5, 0.7$ )at  $10 \text{ mA g}^{-1}$  (1/20 C) at different temperatures.

| T<br>(°C) | Sample                                                                           | 1 <sup>st</sup><br>charge<br>capacity<br>(mAh g <sup>-1</sup> ) | 1 <sup>st</sup><br>discharge<br>capacity<br>(mAh g <sup>-1</sup> ) | Eff.<br>(%) | 2 <sup>nd</sup><br>charge<br>capacity<br>(mAh g <sup>-1</sup> ) | 2 <sup>nd</sup><br>discharge<br>capacity<br>(mAh g <sup>-1</sup> ) | Eff.<br>(%) |
|-----------|----------------------------------------------------------------------------------|-----------------------------------------------------------------|--------------------------------------------------------------------|-------------|-----------------------------------------------------------------|--------------------------------------------------------------------|-------------|
|           | $\text{Li}_2\text{MnO}_3(\text{A})$                                              | 361.4                                                           | 225.2                                                              | 62.3        | 258.4                                                           | 206.3                                                              | 79.8        |
|           | $\text{LiNi}_{0.5}\text{Co}_{0.2}\text{Mn}_{0.3}\text{O}_2(\text{B})^{\text{a}}$ | 215.4                                                           | 145.4                                                              | 67.5        | 176.3                                                           | 136.8                                                              | 77.6        |
| 400       | 0.3A · 0.7B                                                                      | 219.9                                                           | 180.4                                                              | 82.0        | 206.5                                                           | 181.9                                                              | 88.1        |
|           | 0.5A · 0.5B                                                                      | 219.8                                                           | 155.3                                                              | 70.7        | 207.9                                                           | 159.0                                                              | 76.5        |
|           | 0.7A · 0.3B                                                                      | 269.1                                                           | 175.3                                                              | 65.1        | 216.2                                                           | 172.1                                                              | 79.6        |
| 700       | 0.3A · 0.7B                                                                      | 246.2                                                           | 183.3                                                              | 74.5        | 193.3                                                           | 179.9                                                              | 93.1        |
|           | 0.5A · 0.5B                                                                      | 233.1                                                           | 172.4                                                              | 74.0        | 186.9                                                           | 171.3                                                              | 91.7        |
|           | 0.7A · 0.3B                                                                      | 222.0                                                           | 151.9                                                              | 68.4        | 181.4                                                           | 164.6                                                              | 90.7        |
| 1000      | 0.3A · 0.7B                                                                      | 262.2                                                           | 207.2                                                              | 79.0        | 211.0                                                           | 203.4                                                              | 96.4        |
|           | 0.5A · 0.5B                                                                      | 299.8                                                           | 228.9                                                              | 76.4        | 231.6                                                           | 226.2                                                              | 97.7        |
|           | 0.7A · 0.3B                                                                      | 302.9                                                           | 206.3                                                              | 68.1        | 219.4                                                           | 213.3                                                              | 97.2        |

<sup>a</sup> Tested with different ratios of active material : binder : carbon = 93 : 3 : 4 with Ketjen black (KB-500JD)
